# Supplementary material for: Hummingbird flight stability and control in freestream turbulent winds
Source: Oxford University Press journal article supplement (doi:10.1242/jeb.114553), 2015-01-01
Supplement: jeb114553supp.pdf [file jeb114553supp.pdf]

**Table S1. Summary of turbulence properties in each flow conditions. x, y & z represent the longitudinal (downstream), lateral and vertical directions with respect to the wind tunnel**

| Flow Condition                 | Turbulence Intensity (Ti) |                 |                 |                   | Integral Length Scale (L), cm |     |      |
|--------------------------------|---------------------------|-----------------|-----------------|-------------------|-------------------------------|-----|------|
|                                | Ti <sub>x</sub>           | Ti <sub>y</sub> | Ti <sub>z</sub> | Ti <sub>Tot</sub> | Lxx                           | Lxy | Lxz  |
| Smooth Flow (No Grid)          | 1.2%                      | 1.1%            | 1%              | 1.2%              | -                             | -   | -    |
| Turbulent Flow (4 x 4 cm grid) | 14.33%                    | 16.21%          | 15.65%          | 15.97%            | 4.12                          | 3.6 | 4.64 |

**Table S2. Standard deviations of distance maintained between the head and feeder, and absolute mean accelerations experienced by the head and body of each bird along the longitudinal, lateral and vertical directions**

| Bird | Flow Condition | $\sigma$ Distance between head and feeder (mm) | Head accelerations (m/s <sup>2</sup> ) |         |          | Body accelerations (m/s <sup>2</sup> ) |         |          |
|------|----------------|------------------------------------------------|----------------------------------------|---------|----------|----------------------------------------|---------|----------|
|      |                |                                                | Longitudinal                           | Lateral | Vertical | Longitudinal                           | Lateral | Vertical |
| 1    | smooth         | 0.24                                           | 0.90                                   | 0.49    | 0.54     | 1.09                                   | 2.05    | 2.32     |
| 2    | smooth         | 0.64                                           | 1.23                                   | 0.61    | 1.51     | 1.11                                   | 2.67    | 1.41     |
| 3    | smooth         | 0.44                                           | 0.45                                   | 0.48    | 0.92     | 0.72                                   | 1.17    | 1.81     |
| 4    | smooth         | 0.25                                           | 1.15                                   | 0.62    | 1.35     | 0.85                                   | 2.44    | 1.25     |
| 1    | turbulent      | 0.21                                           | 0.69                                   | 0.64    | 0.99     | 2.04                                   | 4.61    | 2.86     |
| 2    | turbulent      | 1.28                                           | 0.90                                   | 0.80    | 0.85     | 2.77                                   | 12.11   | 4.58     |
| 3    | turbulent      | 1.61                                           | 1.30                                   | 0.72    | 0.94     | 1.53                                   | 4.76    | 3.22     |
| 4    | turbulent      | 0.33                                           | 1.43                                   | 1.03    | 1.53     | 3.22                                   | 9.92    | 5.11     |

**Table S3. Absolute mean rotation rates of the head, body and tail of each bird around the longitudinal (roll), lateral (pitch) and vertical (yaw) body axes**

| Bird | Flow Condition | Head rotations (deg/s) |       |       | Body rotations (deg/s) |        |        | Tail rotations (deg/s) |        |        |
|------|----------------|------------------------|-------|-------|------------------------|--------|--------|------------------------|--------|--------|
|      |                | Roll                   | Pitch | Yaw   | Roll                   | Pitch  | Yaw    | Roll                   | Pitch  | Yaw    |
| 1    | smooth         | 101.43                 | 26.31 | 20.94 | 172.37                 | 138.53 | 75.95  | 168.18                 | 176.03 | 171.16 |
| 2    | smooth         | 211.93                 | 39.82 | 40.56 | 208.78                 | 95.59  | 105.58 | 238.01                 | 218.57 | 188.83 |
| 3    | smooth         | 120.26                 | 66.49 | 28.79 | 137.24                 | 106.26 | 107.33 | 367.61                 | 231.96 | 96.286 |
| 4    | smooth         | 181.79                 | 63.68 | 23.63 | 153.65                 | 104.81 | 42.05  | 100.43                 | 87.018 | 67.525 |
| 1    | turbulent      | 176.25                 | 27.96 | 43.31 | 635.98                 | 160.35 | 275.14 | 401.26                 | 387.99 | 379    |
| 2    | turbulent      | 123.58                 | 65.65 | 50.23 | 711.33                 | 246.80 | 208.87 | 449.33                 | 356.99 | 687.88 |
| 3    | turbulent      | 110.05                 | 80.91 | 45.56 | 702.25                 | 261.08 | 392.11 | 781.82                 | 412.74 | 341.86 |
| 4    | turbulent      | 148.94                 | 82.28 | 62.02 | 977.01                 | 333.95 | 371.59 | 651.24                 | 510.98 | 598.69 |

**Table S4. Mean and standard deviation of tail fan angle for each bird**

| Bird | Flow Condition | Mean Tail Fan Angle (deg) | $\sigma$ Tail Fan Angle (deg) |
|------|----------------|---------------------------|-------------------------------|
| 1    | smooth         | 61.11                     | 7.71                          |
| 2    | smooth         | 57.12                     | 7.09                          |
| 3    | smooth         | 56.82                     | 4.22                          |
| 4    | smooth         | 65.20                     | 1.84                          |
| 1    | turbulent      | 110.22                    | 12.76                         |
| 2    | turbulent      | 70.89                     | 18.27                         |
| 3    | turbulent      | 72.56                     | 13.69                         |
| 4    | turbulent      | 88.14                     | 12.75                         |

**Table S5. Lift and drag forces measured on a static hummingbird body with various body angles and tail configurations in smooth flow**

| Body AoA (deg) | Tail AoA (deg) | Tail Fan Angle (deg) | Lift, N | Drag, N |
|----------------|----------------|----------------------|---------|---------|
| 0              | 0              | 58                   | 0.0091  | 0.0040  |
| 0              | 15             | 58                   | 0.0093  | 0.0046  |
| 0              | 0              | 103                  | 0.0095  | 0.0043  |
| 0              | 15             | 103                  | 0.0097  | 0.0047  |
| 20             | 0              | 58                   | 0.0156  | 0.0173  |
| 20             | 15             | 58                   | 0.0160  | 0.0176  |
| 20             | 0              | 103                  | 0.0170  | 0.0183  |
| 20             | 15             | 103                  | 0.0174  | 0.0194  |

**Table S6. Mean values of wing kinematic parameters for each bird**

| Bird | Flow Condition | Mean flapping frequency (Hz) | Mean stroke amplitude – left (deg) | Mean stroke amplitude – right (deg) | Mean stroke plane angle - left (deg) | Mean stroke plane angle – right (deg) |
|------|----------------|------------------------------|------------------------------------|-------------------------------------|--------------------------------------|---------------------------------------|
| 1    | smooth         | 41.66                        | 100.33                             | 97.22                               | 50.98                                | 49.02                                 |
| 2    | smooth         | 42.78                        | 98.65                              | 99.97                               | 49.3                                 | 48.17                                 |
| 3    | smooth         | 41.56                        | 97.35                              | 98.47                               | 54.88                                | 55.15                                 |
| 4    | smooth         | 40.21                        | 95.2                               | 97.76                               | 50.34                                | 51.51                                 |
| 1    | turbulent      | 42.78                        | 103.72                             | 109.45                              | 66.81                                | 63.47                                 |
| 2    | turbulent      | 43.79                        | 100.82                             | 103.3                               | 55.63                                | 54.74                                 |
| 3    | turbulent      | 43.47                        | 107.68                             | 102.4                               | 56.72                                | 57.66                                 |
| 4    | turbulent      | 41.67                        | 109.55                             | 104.45                              | 65.58                                | 64.45                                 |

**Table S7. Standard deviations of wing kinematic parameters for each bird**

| Bird | Flow      | Flapping Frequency (Hz) | Stroke amplitude – left (deg) | Stroke amplitude , right, (Deg) | Bilateral asymmetry stroke amplitude, (Deg) | Max. bilateral asymmetry stroke amplitude, (Deg) | Stroke plane angle, (left) (Deg) | Stroke plane angle, (right) , (Deg) | Bilateral asymmetry stroke plane angle, (Deg) | Max. bilateral asymmetry stroke plane angle, (Deg) |
|------|-----------|-------------------------|-------------------------------|---------------------------------|---------------------------------------------|--------------------------------------------------|----------------------------------|-------------------------------------|-----------------------------------------------|----------------------------------------------------|
| 1    | smooth    | 0.18                    | 5.97                          | 5.87                            | 6.87                                        | 15.76                                            | 2.11                             | 2.11                                | 2.55                                          | 5.34                                               |
| 2    | smooth    | 0.11                    | 6.67                          | 5.71                            | 7.17                                        | 14.72                                            | 3.51                             | 3.11                                | 2.39                                          | 6.72                                               |
| 3    | smooth    | 0.08                    | 5.57                          | 5.16                            | 7.94                                        | 17.22                                            | 1.56                             | 1.25                                | 2.36                                          | 3.29                                               |
| 4    | smooth    | 0.15                    | 2.73                          | 3.66                            | 2.88                                        | 9.53                                             | 1.81                             | 1.77                                | 2.65                                          | 4.90                                               |
| 1    | turbulent | 1.1                     | 6.70                          | 8.61                            | 12.64                                       | 36.19                                            | 3.05                             | 2.51                                | 3.19                                          | 9.00                                               |
| 2    | turbulent | 0.5                     | 11.97                         | 13.31                           | 13.40                                       | 46.47                                            | 5.34                             | 5.84                                | 4.13                                          | 11.40                                              |
| 3    | turbulent | 0.8                     | 8.32                          | 9.93                            | 13.55                                       | 38.11                                            | 3.62                             | 3.51                                | 4.05                                          | 8.64                                               |
| 4    | turbulent | 0.8                     | 15.76                         | 16.76                           | 26.17                                       | 40.21                                            | 4.25                             | 6.11                                | 5.26                                          | 9.45                                               |

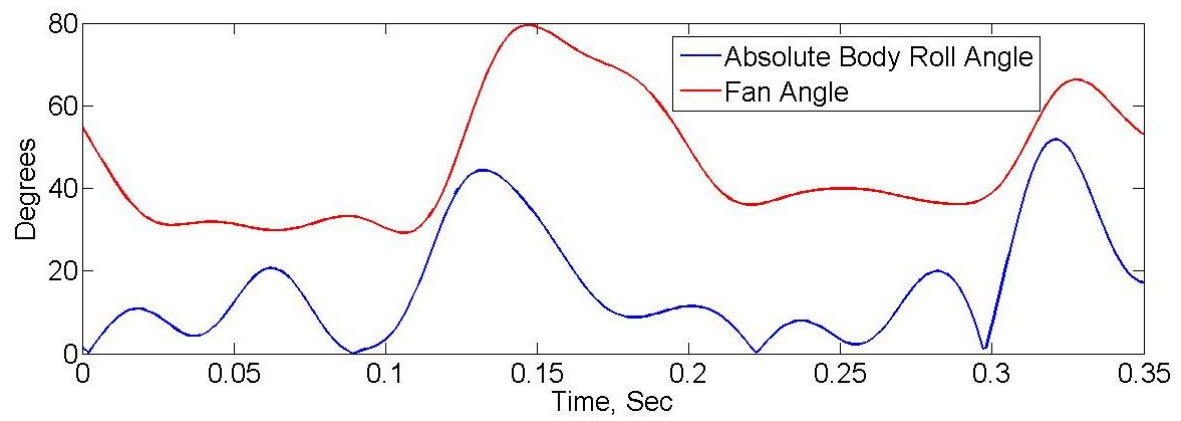

**Fig. S1.** Representative time series showing absolute roll angle of the body and tail fan angle for bird 2 in turbulent flow. Rapid increase in tail fan angle appears to coincide with high roll angle of the body.

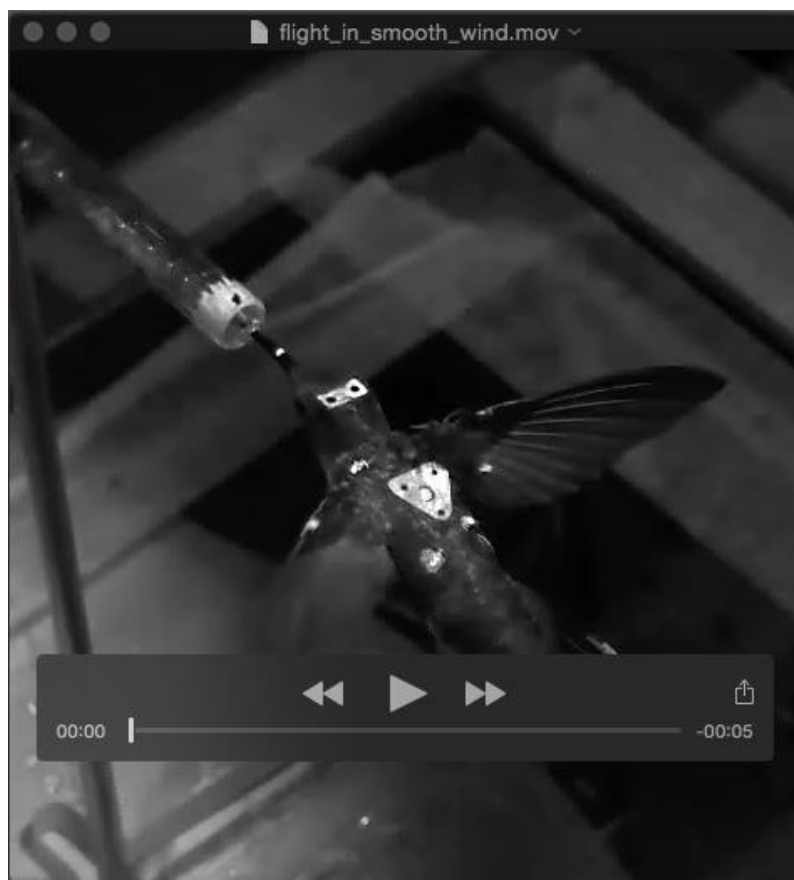

Movie 1: Hummingbird flying in smooth wind. The video shows a hummingbird flying in smooth wind experiences minimal perturbations.

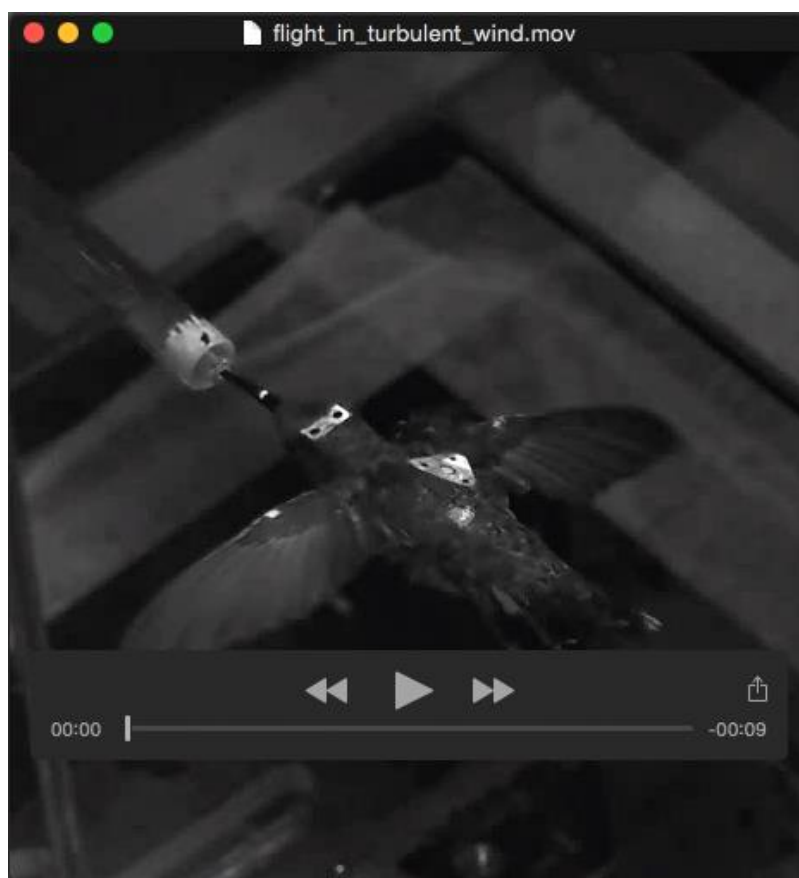

Movie 2: Hummingbird flying in turbulent wind. The video shows a hummingbird flying in turbulent wind. The bird's body experiences significant translational and rotational disturbances when flying in highly turbulent winds. The tail fan angle can also be seen to vary in flight. However the head remains stable in flight.
